# Supplementary material for: [Recording of the right atrial monophasic action potential in humans. I. Subjects not affected by arrhythmia].
Source: MDPI journal article supplement (doi:10.3390/ph16071007), 1978-06-01
Supplement: s1 [file s1]

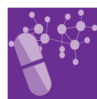

## Supplementary material

**Table S1.** LD data of NLC formulations that contain a different concentration of octadecylamine (0–0.15%, w/w) in a function of time (30, 60, 90, 180 days, and 270 days stored at three different temperature conditions

| Storage conditions        | Formulation | 1 month            |                    |                     | 2 months           |                    |                     | 3 months           |                    |                     | 6 months           |                    |                     | 9 months           |                    |                     |
|---------------------------|-------------|--------------------|--------------------|---------------------|--------------------|--------------------|---------------------|--------------------|--------------------|---------------------|--------------------|--------------------|---------------------|--------------------|--------------------|---------------------|
|                           |             | d <sub>(0.5)</sub> | d <sub>(0.9)</sub> | d <sub>(0.99)</sub> | d <sub>(0.5)</sub> | d <sub>(0.9)</sub> | d <sub>(0.99)</sub> | d <sub>(0.5)</sub> | d <sub>(0.9)</sub> | d <sub>(0.99)</sub> | d <sub>(0.5)</sub> | d <sub>(0.9)</sub> | d <sub>(0.99)</sub> | d <sub>(0.5)</sub> | d <sub>(0.9)</sub> | d <sub>(0.99)</sub> |
| 4 ± 3 °C                  | bNLC        | 0.128 ± 0.000      | 0.188 ± 0.002      | 0.240 ± 0.001       | 0.128 ± 0.000      | 0.189 ± 0.001      | 0.250 ± 0.000       | 0.129 ± 0.002      | 0.191 ± 0.002      | 0.250 ± 0.000       | 0.134 ± 0.002      | 0.198 ± 0.002      | 0.253 ± 0.006       | 0.130 ± 0.001      | 0.194 ± 0.001      | 0.250 ± 0.000       |
|                           | cNLC-2      | 0.125 ± 0.001      | 0.205 ± 0.000      | 0.270 ± 0.000       | 0.126 ± 0.000      | 0.232 ± 0.002      | 0.331 ± 0.001       | 0.130 ± 0.000      | 0.191 ± 0.000      | 0.250 ± 0.000       | 0.130 ± 0.000      | 0.191 ± 0.000      | 0.250 ± 0.000       | 0.130 ± 0.000      | 0.193 ± 0.000      | 0.250 ± 0.000       |
|                           | cNLC-3      | 0.129 ± 0.000      | 0.228 ± 0.000      | 0.270 ± 0.000       | 0.129 ± 0.000      | 0.191 ± 0.000      | 0.250 ± 0.000       | 0.130 ± 0.000      | 0.192 ± 0.000      | 0.230 ± 0.000       | 0.131 ± 0.000      | 0.192 ± 0.000      | 0.250 ± 0.000       | 0.130 ± 0.000      | 0.193 ± 0.000      | 0.250 ± 0.000       |
| 25 ± 2 °C<br>(60 ± 5% RH) | bNLC        | 0.129 ± 0.000      | 0.227 ± 0.000      | 0.250 ± 0.000       | 0.128 ± 0.000      | 0.189 ± 0.001      | 0.220 ± 0.000       | 0.134 ± 0.002      | 0.196 ± 0.002      | 0.253 ± 0.006       | 0.136 ± 0.001      | 0.200 ± 0.001      | 0.260 ± 0.000       | 0.150 ± 0.005      | 0.265 ± 0.004      | 0.360 ± 0.000       |
|                           | cNLC-2      | 0.121 ± 0.000      | 0.207 ± 0.000      | 0.240 ± 0.000       | 0.128 ± 0.000      | 0.188 ± 0.000      | 0.240 ± 0.001       | 0.129 ± 0.001      | 0.189 ± 0.000      | 0.240 ± 0.000       | 0.130 ± 0.000      | 0.191 ± 0.000      | 0.251 ± 0.000       | 0.129 ± 0.000      | 0.190 ± 0.000      | 0.250 ± 0.000       |
|                           | cNLC-3      | 0.122 ± 0.000      | 0.226 ± 0.001      | 0.290 ± 0.001       | 0.129 ± 0.001      | 0.190 ± 0.000      | 0.250 ± 0.000       | 0.130 ± 0.001      | 0.190 ± 0.000      | 0.250 ± 0.000       | 0.130 ± 0.000      | 0.191 ± 0.000      | 0.250 ± 0.000       | 0.129 ± 0.000      | 0.191 ± 0.000      | 0.250 ± 0.000       |
| 40 ± 2 °C<br>(75 ± 5% RH) | bNLC        | 0.132 ± 0.000      | 0.220 ± 0.002      | 0.230 ± 0.000       | 0.128 ± 0.001      | 0.170 ± 0.000      | 0.230 ± 0.000       | 0.130 ± 0.000      | 0.190 ± 0.001      | 0.240 ± 0.000       | 0.142 ± 0.002      | 0.230 ± 0.001      | 0.293 ± 0.006       | 0.141 ± 0.004      | 0.229 ± 0.009      | 1.223 ± 0.014       |
|                           | cNLC-2      | 0.126 ± 0.001      | 0.208 ± 0.000      | 0.271 ± 0.000       | 0.128 ± 0.000      | 0.165 ± 0.002      | 0.220 ± 0.000       | 0.128 ± 0.001      | 0.187 ± 0.002      | 0.240 ± 0.000       | 0.139 ± 0.001      | 0.210 ± 0.004      | 0.270 ± 0.000       | 0.138 ± 0.001      | 0.222 ± 0.002      | 0.283 ± 0.006       |
|                           | cNLC-3      | 0.122 ± 0.000      | 0.221 ± 0.002      | 0.250 ± 0.000       | 0.129 ± 0.000      | 0.161 ± 0.001      | 0.220 ± 0.000       | 0.128 ± 0.001      | 0.195 ± 0.001      | 0.240 ± 0.000       | 0.133 ± 0.000      | 0.195 ± 0.000      | 0.250 ± 0.000       | 0.129 ± 0.000      | 0.191 ± 0.000      | 0.250 ± 0.001       |
